# Supplementary material for: Epigenetic Control of Autophagy Related Genes Transcription in Pulpitis via JMJD3
Source: Frontiers journal article supplement (doi:10.3389/fcell.2021.654958), 2021-08-09
Supplement: Data_Sheet_1.PDF [file Data_Sheet_1.PDF]

Supplemental data

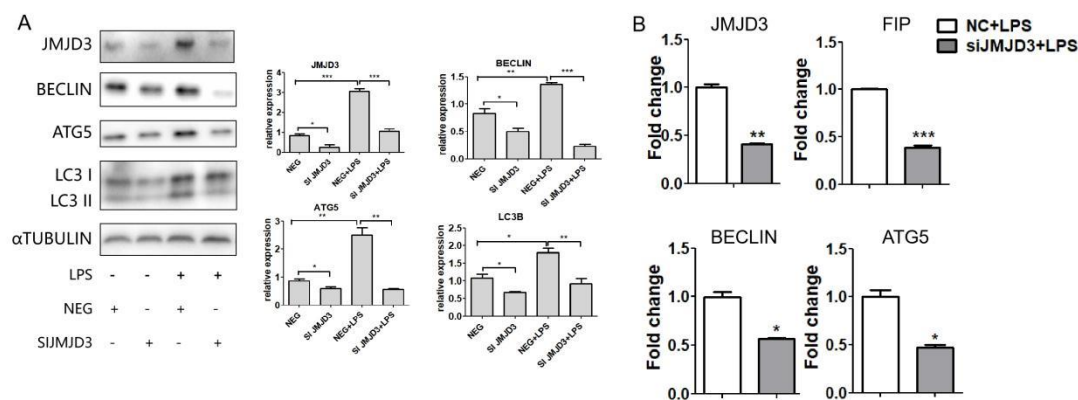

WB (A) and QPCR (B) analysis of autophagy related genes in response to JMJD3 siRNA with or without LPS treatment.
